# Supplementary material for: NBM-HD-1: A Novel Histone Deacetylase Inhibitor with Anticancer Activity
Source: Evid Based Complement Alternat Med. 2011 Oct 20;2012:781417. doi: 10.1155/2012/781417 (PMC3199191; doi:10.1155/2012/781417)
Supplement: Supplementary file 1 — NBM-HD-1 was derived from propolin G via the two processes of methylation and hydration. The steps of extraction, isolation of Propolin G from Taiwanese Green Propolis (TGP), and the processes of methylation and hydration from Propolin G are available in the supplementary material. [file 781417.f1.doc]

**Supplementary Materials and Methods**

**Extraction and isolation of Propolin G (1)**

TGP (200 g) was extracted with 95% ethyl alcohol (2000 mL ×3), sonicated for 3 h, and left to stand for 7 days at 25°C. The filtered ethanol extract was evaporated to dryness under reduced pressure to yield a brown gum (150.2 g), which was kept at -20°C until used. A portion of this extract (10.0 g) was fractionated over a Sephadex LH-20 column (Amersham Pharmacia Biotech AB, Uppsala, Sweden) using methanol as the solvent to elute and furnish six fractions. All eluates, including fractions from the follow-up chromatographic runs, were assayed for brain cancer cell growth inhibition, and the active fractions were chromatographed again on a silica gel column using a gradient solvent system of *n*-hexane and EtOAc for elution. Purification of the most active fraction 3 (*n*-hexane: EtOAc, 70: 30) was carried out on a reversed-phase (RP) preparative high-performance liquid chromatography (HPLC)/ultraviolet (UV) unit. Fractions at retention times of 25.0 min corresponding to propolin G were collected. Conditions were as follows: a Luna Phenomenex column (C18, 250 × 10 mm); a solvent system of methanol: water (8.5: 1.5); a flow rate of 3.5 mL/min; and detection at UV 280 nm. We identified the compound as propolin G (Fig. 1). The purity of the propolin G was estimated to be no less than 95% by HPLC/UV based on the peak area.

**Preparation of 3',4',5,7-O-tetramethyl Propolin G (2)**

To a solution of propolin G (**1**)(152 mg, 0.31 mmol), K2CO3 (431 mg, 3.1 mmol) and acetone (15 mL) were added with Me2SO4 (0.25 mL, 2.48 mmol), and the resulting solution was heated under N2 for 24 h. After removal of the organic solvent, the residue was dissolved in CH2Cl2 (50 mL) and washed with distilled (dis)-H2O (50 mL x3). The organic layer was dried over Na2SO4 and evaporated under reduced pressure. The residue obtained was purified by a silica gel column (EtOAc: *n*-hexane = 1: 6) to give **2** (127 mg, yield: 75%). 1H-NMR (400 MHz, CDCl3) 7.26 (1H, d, J=8.6 Hz), 6.86 (1H, d, J=8.6 Hz), 6.27 (1H, s), 5.50 (1H, dd, J=2.5, 13.5 Hz), 5.14-5.11 (1H, m), 5.11-5.10 (1H, m), 5.02-4.99 (1H, m), 3.87 (3H, s), 3.83 (3H, s), 3.79 (6H, s), 3.50 (1H, dd, J=6.6, 15.2 Hz), 3.43 (1H, dd, J=5.8, 15.2 Hz), 3.00 (1H, dd, J=13.5, 16.7 Hz) , 2.68 (1H, dd, J=2.6, 16.7 Hz), 2.00-1.92 (2H, m), 1.75 (3H, s), 1.70 (3H, s), 1.65 (3H, s), 1.60 (3H, s), 1.52 (3H, s); 13C-NMR (100 MHz, CDCl3)  189.4 (s), 164.0 (s), 163.3 (s), 159.6 (s), 153.0 (s), 147.2 (s), 135.6 (s), 134.2 (s), 131.5 (s), 131.3 (s), 129.8 (s), 124.1 (d), 122.8 (d), 122.7 (d), 122.1 (d), 118.2 (s), 110.3 (d), 108.7 (s), 95.6 (d), 75.9 (d), 61.8 (q), 60.7 (q), 55.7 (q), 55.7 (q), 45.1 (t), 39.6 (t), 26.6 (t), 25.7 (q), 25.6 (q), 24.9 (t), 22.0 (t), 17.7 (q), 17.6 (q), 16.3 (q); HREIMS *m/z* 548.3140 (calcd. for C34H44O6 548.3142).

**Preparation of 6-(3-hydroxy-3-methylbutyl)-2’-(7-hydroxy-3,7-dimethyloct-3-enyl)-3',4',5,7-tetramethoxyflavanone (3)**

To a solution of **2** (200 mg, 0.37 mmol) in THF (6 mL) was added 49% H2SO4 (4 mL) in a dropwise manner in an ice bath. The reaction mixture was then stirred at room temperature (RT) for 8 h and diluted with H2O. The aqueous layer was extracted with CH2Cl2 (50 mL x3). The combined organic layers were dried over Na2SO4 and evaporated under reduced pressure to give a residue, which was purified by a silica gel column (EtOAc: *n*-hexane 1: 6~1: 1) to give the pure oil **3** (54 mg, yield:25%). IR (KBr) *ν*max cm-1 3745, 3443, 2968, 1676, 1600, 1455; 1H-NMR (400 MHz, CDCl3)  7.27 (1H, d, J=8.6 Hz), 6.87 (1H, d, J=8.6 Hz), 6.28 (1H, d, J=2.6 Hz), 5.49 (1H, dd, J=2.4, 13.6 Hz), 5.05 (1H, t, J=6.0 Hz), 3.87 (3H, s), 3.84 (3H, s), 3.79 (6H, s), 3.52 (1H, dd, J=5.5, 15.2 Hz), 3.43 (1H, dd, J=7.6, 15.2 Hz), 2.97 (1H, dd, J=8.0, 16.7 Hz), 2.70-2.59 (3H, m), 1.93 92H, t, J=6.4 Hz), 1.65 (3H, s), 1.64-1.60 (2H, m), 1.41-1.32 (4H, m), 1.25 (6H, s), 1.15 (3H, s), 1.14 (3H, s); 13C-NMR (100 MHz, CDCl3) 189.4 (s), 164.0 (s), 163.3 (s), 159.6 (s), 153.0 (s), 147.2 (s), 135.6 (s), 134.2 (s), 131.5 (s), 131.3 (s), 129.8 (s), 124.1 (d), 122.8 (d), 122.7 (d), 122.1 (d), 118.2 (s), 110.3 (d), 108.7 (s), 95.6 (d), 75.9 (d), 61.8 (q), 60.7 (q), 55.7 (q), 55.7 (q), 45.1 (t), 39.6 (t), 26.6 (t), 25.7 (q), 25.6 (q), 24.9 (t), 22.0 (t), 17.7 (q), 17.6 (q), 16.3 (q); HREIMS *m/z* 584.3344 (calcd. for C34H48O8 584.3338).
